# Supplementary material
Source: ML conference proceedings conference paper supplement (https://openaccess.thecvf.com/content/ACCV2024/html/Liu_Depth_Attention_for_ACCV_2024_paper.html)
Supplement: Supplementary file 1 [file Liu_Depth_Attention_for_ACCV_2024_supplemental.pdf]

# Supplementary material for: Depth Attention for Robust RGB Tracking

Yu Liu<sup>1</sup>[0009-0009-5898-0113], Arif Mahmood<sup>2</sup>[0000-0001-5986-9876], and  
Muhammad Haris Khan<sup>3</sup>[0000-0001-9746-276X]

<sup>1</sup> Xinjiang University

7501847851y@gmail.com

<sup>2</sup> Information Technology University

arif.mahmood@itu.edu.pk

<sup>3</sup> Mohamed bin Zayed University of Artificial Intelligence

muhammad.haris@mbzuai.ac.ae

**More Attributes Analysis:** We present the analysis of additional attributes in Figure 1, 2, and 3. It is evident that the proposed method enhances performance by addressing challenges such as camera motion, tiny targets, and fast motion. Moreover, it maintains performance in scenarios involving low discriminative features, deformation, and out-of-view situations.

**Precise Depth is not necessary:** The proposed Depth Attention model doesn't heavily depend on precise depth information. To illustrate this, we conducted a comparison between estimated depth and precise depth using a sample from the CDTB dataset [1], which is an RGBD depth dataset. The results of this comparison are depicted in Figure 4.

## References

1. Lukezic, A., Kart, U., Kapyla, J., Durmush, A., Kamarainen, J.K., Matas, J., Kristan, M.: Cdtb: A color and depth visual object tracking dataset and benchmark. In: Proceedings of the IEEE/CVF International Conference on Computer Vision. pp. 10013-10022 (2019)

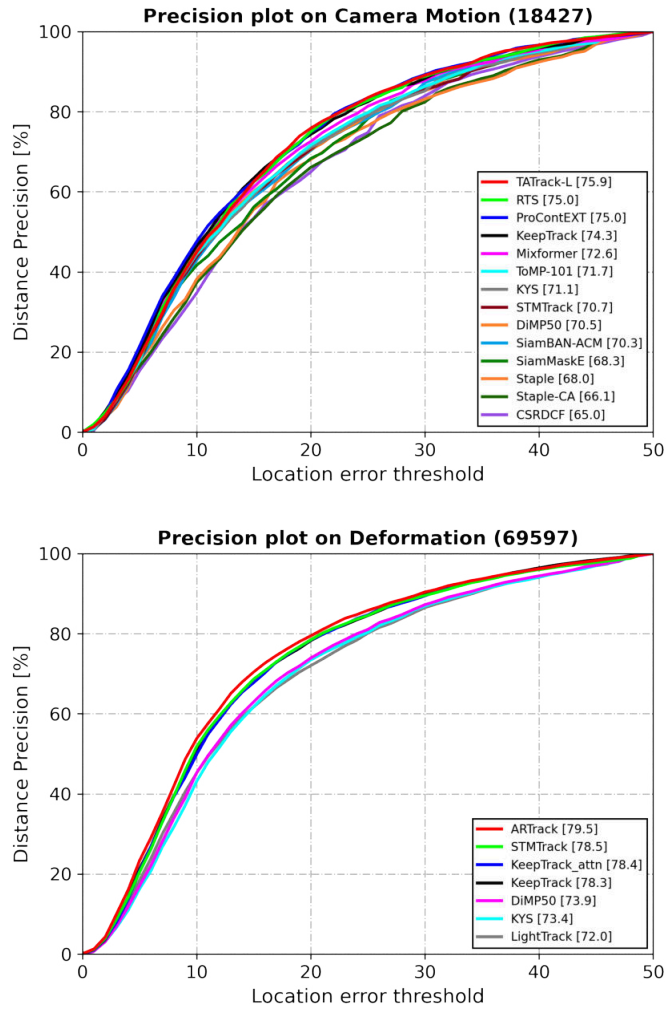

Fig. 1. Additional attributes analysis on camera motion and deformation

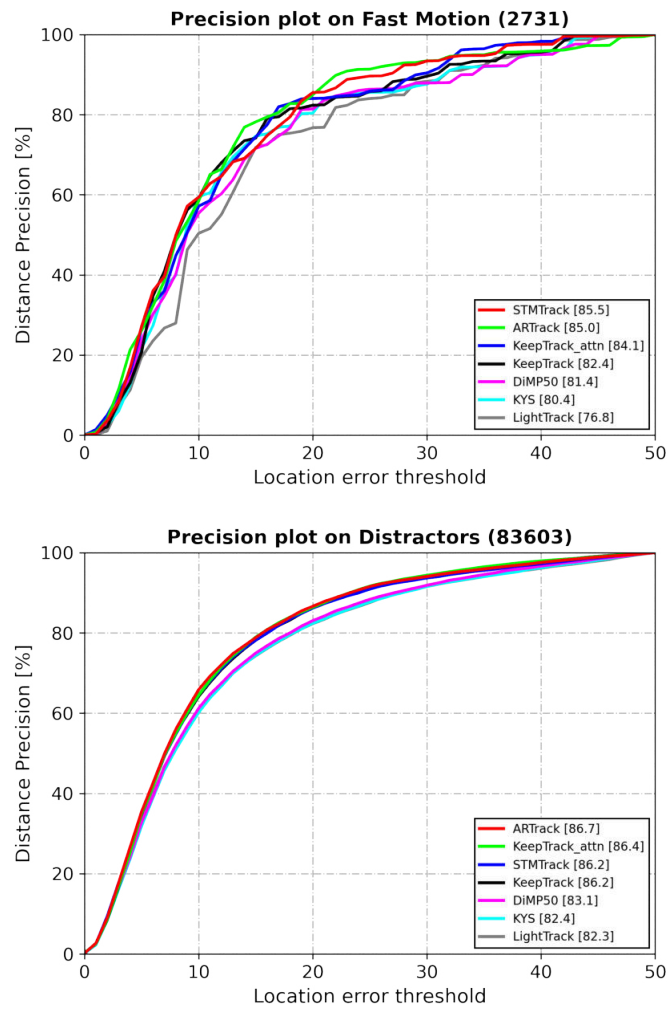

Fig. 2. Additional attributes analysis on fast motion and distractors

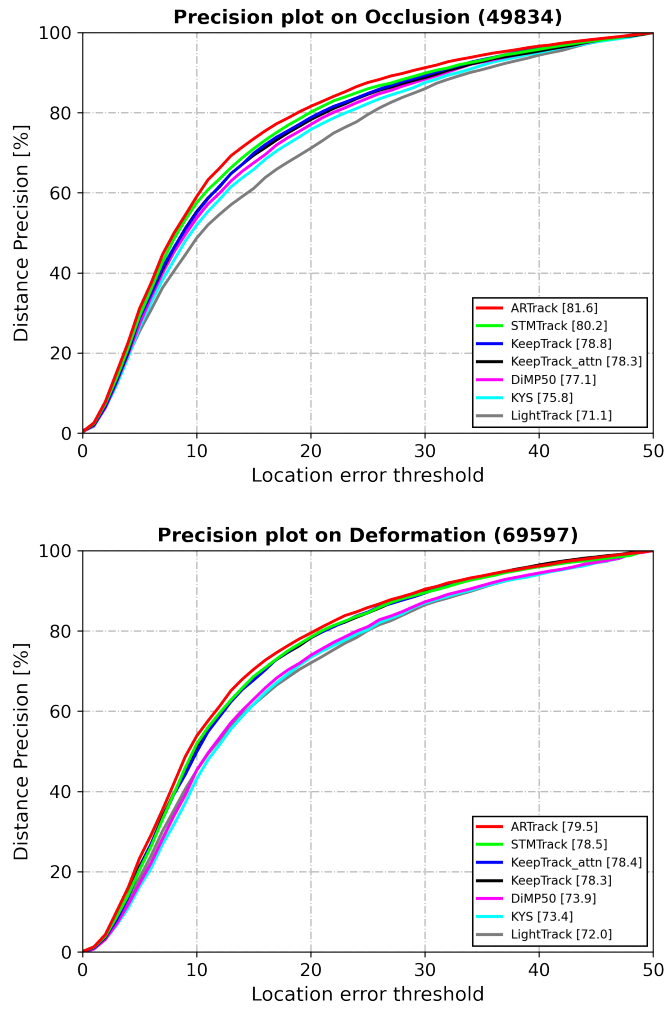

**Fig. 3.** Additional attributes analysis on occlusion and deformation

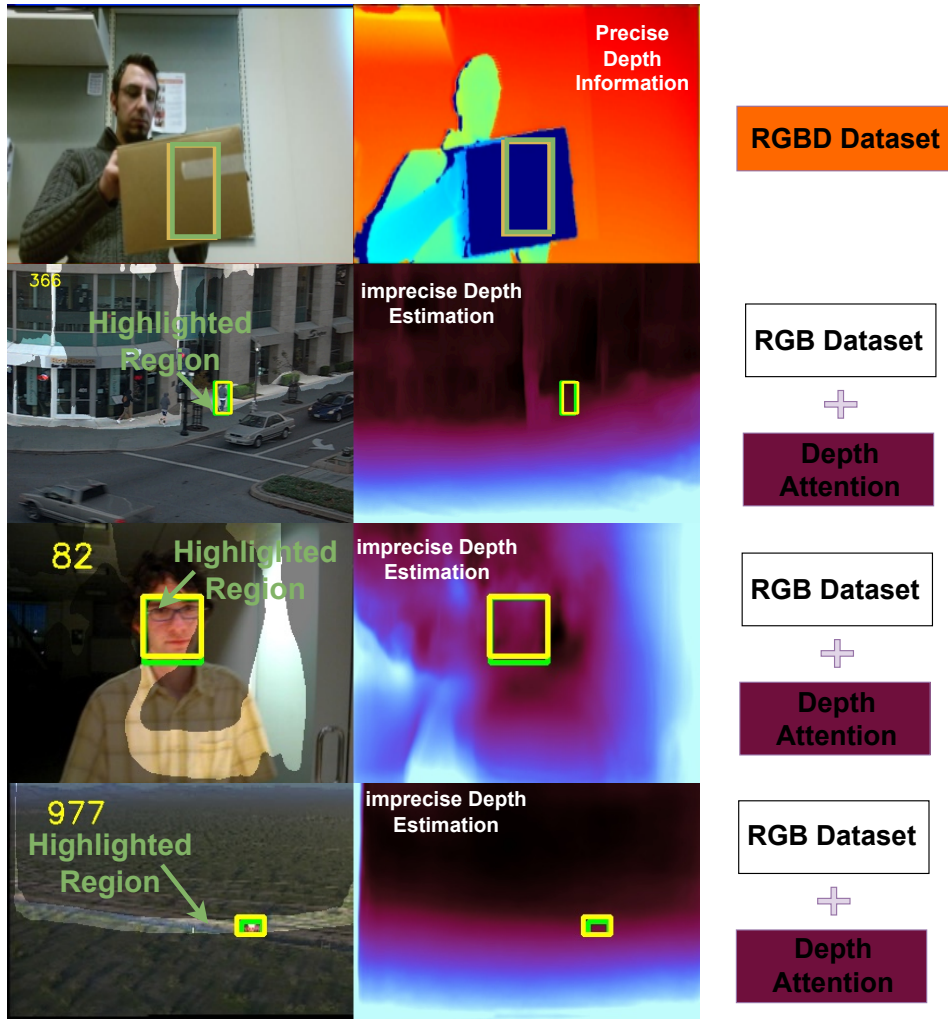

Fig. 4. The proposed method is not reliant on the precise depth information
